# Supplementary material for: Prophylactic Intra-Uterine β-Cyclodextrin Administration during Intra-Uterine Ureaplasma parvum Infection Partly Prevents Liver Inflammation without Interfering with the Enterohepatic Circulation of the Fetal Sheep
Source: MDPI journal article supplement (doi:10.3390/nu12051312), 2020-05-05
Supplement: s1 [file s1]

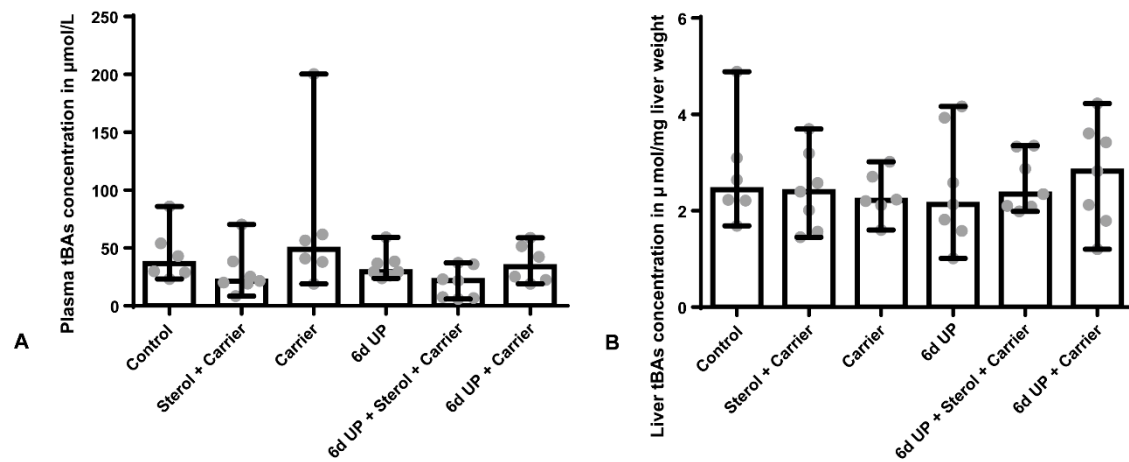

**Figure S1.** tBAs concentrations in plasma (A) in  $\mu\text{mol/L}$  and liver (B) in  $\mu\text{mol/mg}$  liver weight. No differences in the amount of tBAs in plasma or the liver were measured.

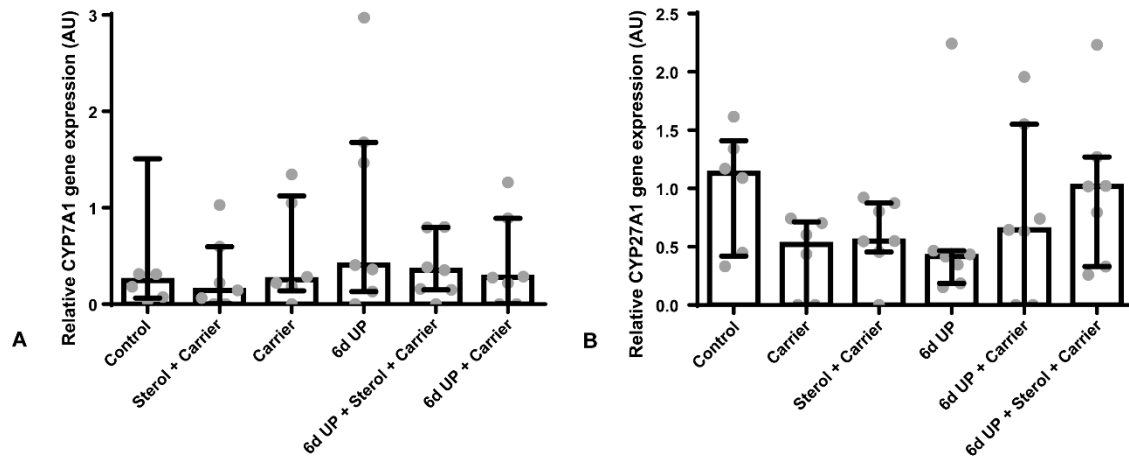

**Figure S2.** Relative gene expression of CYP7A1 (A) and CYP27A1 (B) in AU in the liver. No differences were observed in the mRNA expression of the BAs synthesis markers CYP7A1 and CYP27A1.

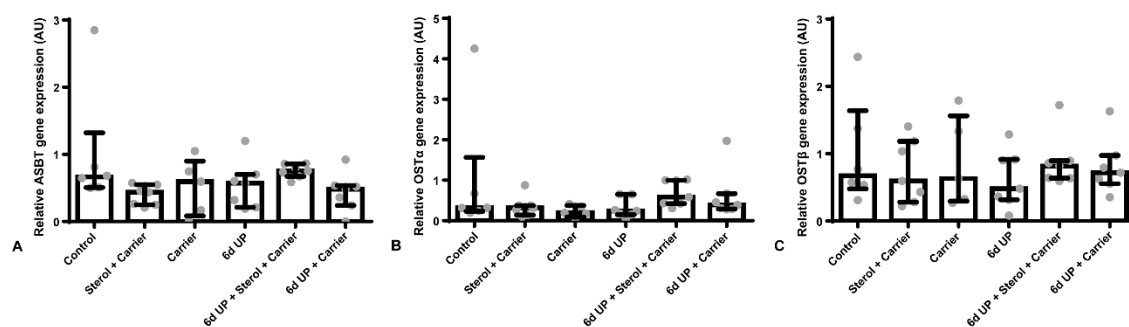

**Figure S3.** Relative gene expression of ASBT (A), OST $\alpha$  (B) and OST $\beta$  (C) in AU. No differences were observed in the mRNA expression of any of these BAs transporters in the gut.

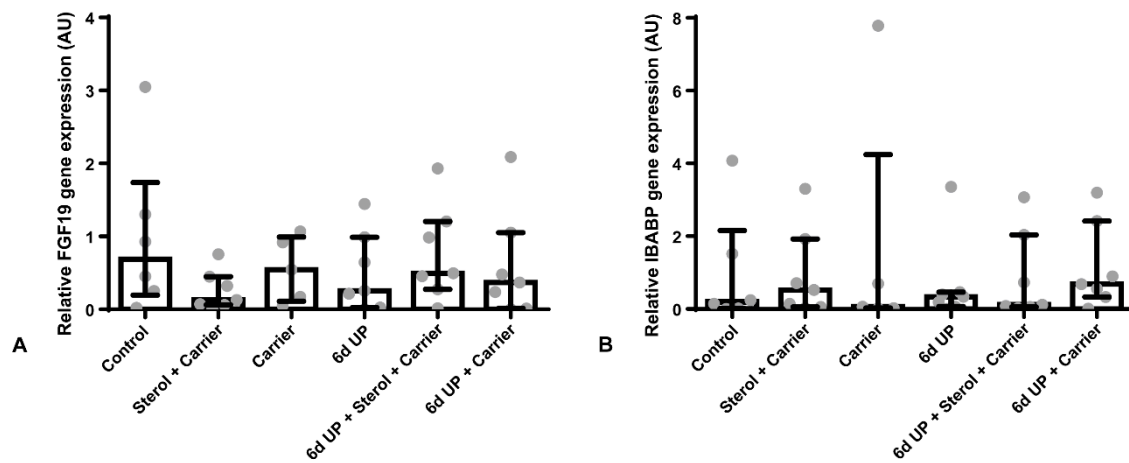

**Figure S4.** Relative gene expression of FGF19 (A) and IBABP (B) in AU. No differences were observed in the mRNA expression of intestinal FGF19 or IBABP.
